# Supplementary material for: Inflammation and Immunity Pathways Regulate Genetic Susceptibility to Diabetic Nephropathy
Source: Oxford University Press journal article supplement (doi:10.2337/db17-1323), 2018-07-31
Supplement: db171323supplementarytable3.xlsx [file db171323supplementarytable3.xlsx]

## Sheet: Sheet1
Supplementary Table 3. List of common and unique KEGG pathways that are enriched for differentially expressed genes between 129 and rat data. Pathways with FDR<30% are considered. Up-regulated and down-regulated pathways are shown separately in rows; common and unique pathways between the two species are separated by columns.
Common_Rat_129_UP	Unique_Rat_UP	Unique_129_UP
KEGG_ECM_RECEPTOR_INTERACTION	KEGG_NATURAL_KILLER_CELL_MEDIATED_CYTOTOXICITY	KEGG_CARDIAC_MUSCLE_CONTRACTION
KEGG_SYSTEMIC_LUPUS_ERYTHEMATOSUS	KEGG_PATHOGENIC_ESCHERICHIA_COLI_INFECTION	KEGG_BLADDER_CANCER
KEGG_COMPLEMENT_AND_COAGULATION_CASCADES	KEGG_PRIMARY_IMMUNODEFICIENCY	KEGG_HYPERTROPHIC_CARDIOMYOPATHY_HCM
KEGG_LEISHMANIA_INFECTION	KEGG_ANTIGEN_PROCESSING_AND_PRESENTATION	KEGG_DILATED_CARDIOMYOPATHY
KEGG_FOCAL_ADHESION	KEGG_RIBOSOME	KEGG_NOD_LIKE_RECEPTOR_SIGNALING_PATHWAY
KEGG_TOLL_LIKE_RECEPTOR_SIGNALING_PATHWAY	KEGG_B_CELL_RECEPTOR_SIGNALING_PATHWAY	KEGG_HOMOLOGOUS_RECOMBINATION
KEGG_CYTOKINE_CYTOKINE_RECEPTOR_INTERACTION	KEGG_LEUKOCYTE_TRANSENDOTHELIAL_MIGRATION	KEGG_VEGF_SIGNALING_PATHWAY
KEGG_CHEMOKINE_SIGNALING_PATHWAY	KEGG_FC_GAMMA_R_MEDIATED_PHAGOCYTOSIS
KEGG_PRION_DISEASES	KEGG_T_CELL_RECEPTOR_SIGNALING_PATHWAY
	KEGG_CELL_CYCLE
Common_Rat_129_DOWN	Unique_Rat_DOWN	Unique_129_DOWN
KEGG_DRUG_METABOLISM_CYTOCHROME_P450	KEGG_BETA_ALANINE_METABOLISM	KEGG_PANTOTHENATE_AND_COA_BIOSYNTHESIS
KEGG_SELENOAMINO_ACID_METABOLISM	KEGG_GLUTATHIONE_METABOLISM	KEGG_TRYPTOPHAN_METABOLISM
KEGG_PEROXISOME	KEGG_PYRUVATE_METABOLISM	KEGG_VALINE_LEUCINE_AND_ISOLEUCINE_DEGRADATION
KEGG_LYSINE_DEGRADATION	KEGG_CYSTEINE_AND_METHIONINE_METABOLISM	KEGG_PHENYLALANINE_METABOLISM
KEGG_GLYCINE_SERINE_AND_THREONINE_METABOLISM	KEGG_GLYCEROPHOSPHOLIPID_METABOLISM	KEGG_BUTANOATE_METABOLISM
	KEGG_METABOLISM_OF_XENOBIOTICS_BY_CYTOCHROME_P450	KEGG_TYROSINE_METABOLISM
	KEGG_HISTIDINE_METABOLISM	KEGG_PROPANOATE_METABOLISM
	KEGG_CITRATE_CYCLE_TCA_CYCLE	KEGG_ALANINE_ASPARTATE_AND_GLUTAMATE_METABOLISM
	KEGG_ALDOSTERONE_REGULATED_SODIUM_REABSORPTION	KEGG_BIOSYNTHESIS_OF_UNSATURATED_FATTY_ACIDS
		KEGG_FATTY_ACID_METABOLISM
